# Supplementary material for: Synthesis and Application of Encapsulated Bifidobacterium longum for Mitigation of Liver Fibrosis via Modulation of Oxidative Stress and Inflammation in a BDL Rat Model
Source: Research Square preprint supplement (doi:10.21203/rs.3.rs-7773331/v1), 2025-10-20
Supplement: Supplementary file 1 [file 3776b8bfd2984ea413305bbf.docx]

| Product size | Annealing TM | Reverse Primer | Forward Primer | Gene |
| --- | --- | --- | --- | --- |
| 135 | 60.0 | CAGCTCAGTAACAGTCCGCC | CTGTGTGGATTGGTGGCTCT | Β Actin |
| 168 | 60.0 | TCCGTTAGCAAGGTCGGATG | CAGCTATGTGGGGGACGAAG | SMAα |
| 106 | 57.0 | GCTTGGTTTGCTACGAC | ATGGGCTCCCTCTCATCAGT | TNFα |
| 120 | 56.0 | TCTGTTGTGGGTGGTATCCT | CTCTCCGCAAGAGACTTCCA | 6IL- |
| 181 | 58.6 | GGGGAGAAATCGATGACAGC | GCAGGACTTTAAGGGTTACTTGG | 10IL- |

**Table 1.** sequences and properties of primers used in evaluating gene expression in this study

**Table 2.** survival rate of free and encapsulated B. lognum in 0, 30, 60, 90 and 120 mintues in stimulated gastric juice

| Time in SGJ | Free *B. longum* | Encapsulated *B. longum* |
| --- | --- | --- |
| 0 | 10 | 10 |
| 30 | 9.71 | 9.79 |
| 60 | 9.204 | 9.72 |
| 90 | 4.612 | 9.6 |
| 120 | 3.501 | 9.47 |

**Table 3.** survival rate of free and encapsulated B. lognum in 0, 30, 60, 90 and 120 mintues in stimulated intestinal fluid

| **Time in SIF** | **Free *B. longum*** | **Encapsulated *B. longum*** |
| --- | --- | --- |
| 0 | 3.501 | 9.47 |
| 30 | 2.69 | 6.58 |
| 60 | 2.47 | 2.3 |
| 90 | 0 | 1.1 |
| 120 | 0 | 0 |

**Table 4.** The effect of bile duct ligation after 3 days on rat liver function tests.

| **Group** | **3-Day sham** | **3-day BDL** |
| --- | --- | --- |
| AST | 198.5±67.15 | 1714.5±89.8  *** |
| ALT | 79±4.94 | 1972±259.5  *** |
| ALP | 556±161.22 | 6038±994.19  ** |
| LDH | 1287±626.49 | 25347±957.42  **** |
| Total bilirubin | 0.07±0.02 | 5.8±0.84  *** |
| Direct bilirubin | 0.045±0.007 | 4.21±0.29  *** |

Data are presented as mean ± standard deviation. Abbreviations: BDL, bile duct-ligated mice; AST, aspartate aminotransferase; ALT, alanine aminotransferase; ALP, alkaline phosphatase; LDH, lactate dehydrogenase; FP, free probiotic; FC, empty capsule; CP, encapsulated probiotic. Asterisks indicate significant differences compared to the BDL control group (*P ≤ 0.05, **P ≤ 0.01, ***P ≤ 0.001, **** P ≤ 0.001). independent T-test was used for analysis between the two groups (number of rats per group= 8)

**Table 5.** The histopathological effects of free B. longum probiotic, alginate-whey protein-chitosan encapsulated B. longum, and empty alginate-whey-chitosan capsules on illeum tissue histological parameters

| **Groups** | **NC** | **SHC** | **BDL+Vehicle** | **BDL+FP** | **BDL+FC** | **BDL+CP** |
| --- | --- | --- | --- | --- | --- | --- |
| Inflammatory cell infiltration | 0 | 0 | 0.33 ± 0.58 | 0 | 0 | 0 |
| submucosal inflammation | 0 | 0 | 0 | 0 | 0 | 0 |
| goblet cell depletion | 0 | 0 | 0.33 ± 0.58 | 0 | 0 | 0 |
| crypt density | 0 | 0 | 1.67 ± 0.58 | 0 | 0 | 0 |
| Crypt hyperplasia | 0 | 0 | 0 | 0 | 0 | 0 |
| muscle layer thickening | 0 | 0 | 0 | 0 | 0 | 0 |
| ulcers and abscesses | Not seen | Not seen | Not seen | 0 | 0 | 0 |
| Description | - | - | Loss of villi number and increase in their length were seen | - | - | - |
